# Supplementary material for: Synthesis, characterization, and hydrogen storage capacities of hierarchical porous carbide derived carbon monolith
Source: Royal Society of Chemistry journal article supplement (doi:10.1039/c2jm34472f), 2012-01-01
Supplement: c2jm34472f.pdf [file c2jm34472f.pdf]

**Electronic Supporting Information:**

**Synthesis, Characterization, and Hydrogen Storage Capacities of  
Hierarchical Porous Carbide Derived Carbon Monolith**

Jiacheng Wang, Martin Oschatz, Tim Biemelt, Lars Borchardt, Irena Senkovska,  
Martin R. Lohe, and Stefan Kaskel \*

Department of Inorganic Chemistry, Dresden University of Technology, Bergstraße 66,  
01069 Dresden, Germany

\*E-mail: [Stefan.kaskel@chemie.tu-dresden.de](mailto:Stefan.kaskel@chemie.tu-dresden.de); Fax: +49 351 46337287; Tel: +49 351  
46334885

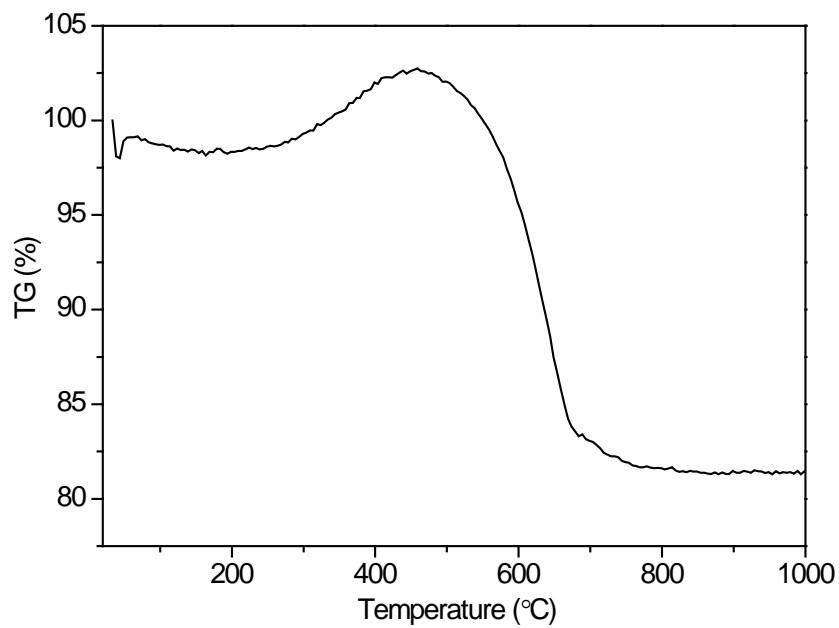

**Fig. S1.** Thermogravimetry (TG) curve of OMSCM prepared at 1200 °C in an air flow (10 °C/min).

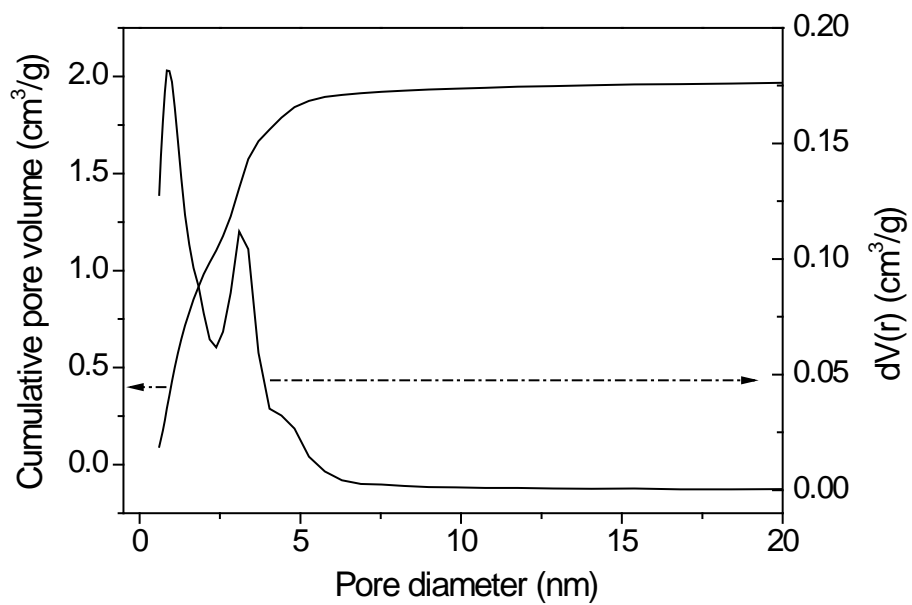

**Fig. S2.** Cumulative pore volume and pore size distribution of the HPCDCM.
